# Supplementary material for: Coronary calcium scoring for long-term mortality prediction in patients with and without a family history of coronary disease
Source: HighWire-hosted journal article supplement (doi:10.1136/heartjnl-2015-308429), 2015-12-23
Supplement: heartjnl-2015-308429supp.xls [file heartjnl-2015-308429supp.xls]

## Sheet: Sheet1
Bootstrap for Variables in the Equation
FH		Beta Coefficient	Bootstrap
			Bias	Std. Error	Sig. (2-tailed)	BCa 95% CI
						Lower	Upper
No FH	Sex	0.117	-0.002	0.111	0.304	-0.098	0.33
	HTN	0.238	0.005	0.11	0.031	0.022	0.473
	Dyslipidemia	-0.265	-0.002	0.116	0.021	-0.494	-0.05
	Smoking	0.397	0.004	0.106	0.001	0.171	0.624
	Diabetes	0.502	0.003	0.137	0.001	0.198	0.768
	CAC Subsets	0.459	0.003	0.038	0.001	0.385	0.549
	Age by Deciles	0.416	0.001	0.054	0.001	0.309	0.529
FH	Sex	-0.054	-0.002	0.087	0.537	-0.224	0.124
	HTN	0.56	0.002	0.09	0.001	0.4	0.742
	Dyslipidemia	-0.416	-0.004	0.087	0.001	-0.589	-0.254
	Smoking	0.629	0.005	0.086	0.001	0.461	0.805
	Diabetes	0.835	0.003	0.112	0.001	0.603	1.051
	CAC Subsets	0.314	-0.001	0.028	0.001	0.256	0.367
	Age by Deciles	0.295	-0.001	0.043	0.001	0.206	0.381
